# Supplementary material for: Narrowing down the distal border of the copy number variable beta-defensin gene cluster on human 8p23
Source: PubMed Central journal article supplement (PMC3942070; doi:10.1186/1756-0500-7-93), 2014-02-19
Supplement: 1756-0500-7-93-S1.pdf [file 1756-0500-7-93-S1.pdf]

|    | origin  | ID      | diploid CN *) |
|----|---------|---------|---------------|
| 1  | CARLA   | 1105758 | 2             |
| 2  | CARLA   | 1123584 | 2             |
| 3  | CARLA   | 5126875 | 2             |
| 4  | Coriell | NA12716 | 2             |
| 5  | FLI-Met | 4779    | 2             |
| 6  | CARLA   | 1102560 | 3             |
| 7  | CARLA   | 1102576 | 3             |
| 8  | CARLA   | 1105126 | 3             |
| 9  | CARLA   | 1112103 | 3             |
| 10 | CARLA   | 1101938 | 4             |
| 11 | CARLA   | 1103200 | 4             |
| 12 | CARLA   | 1103819 | 4             |
| 13 | CARLA   | 3208698 | 5             |
| 14 | CARLA   | 3216315 | 5             |
| 15 | CARLA   | 3216321 | 5             |
| 16 | CARLA   | 5229799 | 6             |
| 17 | CARLA   | 6117387 | 6             |
| 18 | Coriell | NA12760 | 6             |
| 19 | FLI-Met | 2813    | 6             |
| 20 | CARLA   | 2121707 | 7             |
| 21 | CARLA   | 4107150 | 7             |
| 22 | CARLA   | 1128707 | 8             |
| 23 | CARLA   | 5217603 | 8             |
| 24 | CARLA   | 5225985 | 8             |
| 25 | CARLA   | 6132079 | 8             |

\* determined by MLPA with P139 MLPA kit (MRC Holland)

CARLA= A prospective cohort study of the general elderly population,  
Greiser et al. 2005 and 2009 PMID 16283930, 19199053

FLI-Met = DNA methylation study at FLI Jena,  
Stepanow et al. 2011 PMID 21637341

| indel | localization                                   | indel sequence on (+)-strand | diff (bp) | amplicon's lengths (bp) |     | amplification primers                                                         | amplified regions and lengths with respect to hg19 = GRCh 37                                                            | paralog's localization / comment                                |
|-------|------------------------------------------------|------------------------------|-----------|-------------------------|-----|-------------------------------------------------------------------------------|-------------------------------------------------------------------------------------------------------------------------|-----------------------------------------------------------------|
|       |                                                |                              |           |                         |     |                                                                               |                                                                                                                         |                                                                 |
| 1     | DEFB109p (intron 1)                            | CGTT + C<br>(putative novel) | 4+1       | 358                     | 363 | 5'-AATTCACCTGTCTGAAGTTCC-3'<br>5'-(6-FAM)-AAGTAAGGATACAACAGAACA-3'            | chr8:7170725-7171082 358bp<br>chr8:7854329+7854686 358bp<br>chr12:8358585+8358947 363 bp                                | DEF cluster b1<br>DEF cluster b2<br>chr12, no CNV               |
| 2     | 273 bp upstream of start codon ATG of DEFB108p | TTGT (putative novel)        | 4         | 289                     | 293 | 5'-ATACAGTAGTGGATGAGGCCAAATATACA-3'<br>5'-(6-FAM)-CCTTGTTAAATGGGGACATAAAGC-3' | chr8:7230128+7230416 289bp<br>chr8:7796542-7796830 289bp<br>chr11:71543706+71543998 293bp<br>chr4:9400392+9400684 293bp | DEF cluster b<br>DEF cluster b<br>chr11, no CNV<br>chr4, no CNV |
|       |                                                |                              |           |                         |     |                                                                               | chr8:11957294-11957586 293 bp<br>chr8:12203537-12203829 293 bp                                                          | should be discriminated by primer design                        |
| 3     | intergenic DEF cluster b                       | CTGA<br>(rs35176041)         | 4         | 270                     | 274 | 5'-AAGCTGCAATGGATTCTATG-3'<br>5'-(6-FAM)-TTTTCTATTTGGCTTCCTTG-3'              | chr8:7251888+7252157 270bp<br>chr8:7774792-7775061 270bp                                                                | DEF cluster b1<br>DEF cluster b2                                |
| 4     | SPAG11 (intron 2)                              | ACA<br>(rs201835163)         | 3         | 255                     | 258 | 5'-CAAGAGATGGTTGAAAGAAAG-3'<br>5'-(6-FAM)-CTGTCTTGACTAAAGGTGGAC-3'            | chr8:7308949+7309203 255bp<br>chr8:7717384-7717641 258bp                                                                | DEF cluster b1<br>DEF cluster b2                                |
| 5     | DEFB106 (intron1)                              | CCCT<br>(rs3215416)          | 4         | 392                     | 396 | 5'-TTCACAAGCTGTCATAGTGC-3'<br>5'-(6-FAM)-CCTTCCAAGCAAGTTTCTATC-3'             | chr8:7340366+7340761 396bp<br>chr8:7685840-7686235 396bp                                                                | DEF cluster b1<br>DEF cluster b2                                |
| 6     | intergenic between DEFB105 and DEFB107         | AGAA<br>(rs201857400)        | 4         | 310                     | 314 | 5'-GAACACTGCACCAATTACAG-3'<br>5'-(6-FAM)-TTGTAAAGTTGCTGTTGTGTTG-3'            | chr8:7350141+7350454 314bp<br>chr8:7676148-7676461 314bp                                                                | DEF cluster b1<br>DEF cluster b2                                |
| 7     | intergenic, 10 kb proximal to DEFB107          | AAAGG<br>(rs200731641)       | 5         | 321                     | 326 | 5'-ATTTTGGAAATATCTTTTAGTACTTAG-3'<br>5'-(6-FAM)-AGGATACCTACTTATTGGCTTG-3'     | chr8:7376496+7376816<br>chr8:7659241-7659566                                                                            | DEF cluster b1<br>DEF cluster b2                                |

|    | indel    | ID      | Size 1 | Size 2 | Height 1 | Height 2 | Area 1  | Area 2  | area 1/2 ratio | informative | CN (MLPA) | Size 1 | Size 2 | c2813bi |
|----|----------|---------|--------|--------|----------|----------|---------|---------|----------------|-------------|-----------|--------|--------|---------|
| 1  | indel_03 | 1102576 | 268    | 272    | 4,083    | 7,931    | 22,256  | 43,189  | 0.52           | informative | 3         | 1      | 2      | 1+2     |
| 2  | indel_03 | 1105126 | 268    | 272    | 9,996    | 4,805    | 55,155  | 26,662  | 2.07           | informative | 3         | 2      | 1      | 2+1     |
| 3  | indel_03 | 1112103 | 268    | 272    | 11,943   | 5,767    | 66,152  | 32,149  | 2.06           | informative | 3         | 2      | 1      | 2+1     |
| 4  | indel_03 | 1102560 | 268    | 272    | 8,754    | 4,479    | 48,571  | 24,209  | 2.01           | informative | 3         | 2      | 1      | 2+1     |
| 5  | indel_03 | 2813    | 268    | 272    | 14,523   | 7,281    | 81,043  | 40,602  | 2.00           | informative | 6         | 4      | 2      | 4+2     |
| 6  | indel_03 | 5229799 | 268    | 271    | 4,345    | 1,847    | 49,900  | 23,528  | 2.12           | informative | 6         | 4      | 2      | 4+2     |
| 7  | indel_03 | NA12716 | 268    | 272    | 8,369    | 8,188    | 49,010  | 49,048  | 1.00           | bi (1:1)    | 2         | 1      | 1      | 1+1     |
| 8  | indel_03 | 1105758 | 268    | 272    | 8,349    | 8,375    | 46,496  | 46,722  | 1.00           | bi (1:1)    | 2         | 1      | 1      | 1+1     |
| 9  | indel_03 | 1101938 | 268    | 272    | 6,003    | 6,056    | 33,986  | 33,297  | 1.02           | bi (1:1)    | 4         | 2      | 2      | 2+2     |
| 10 | indel_03 | 1103200 | 268    | 272    | 7,035    | 6,873    | 42,311  | 41,572  | 1.02           | bi (1:1)    | 4         | 2      | 2      | 2+2     |
| 11 | indel_03 | 5126875 | 268    | 272    | 4,113    | 3,069    | 25,545  | 19,114  | 1.34           | ambiguous   | 2         |        |        |         |
| 12 | indel_03 | 1103819 | 268    |        | 10,342   |          | 58,162  |         |                | mono        | 4         | 4      | 0      | 4+0     |
| 13 | indel_03 | 1128707 | 268    |        | 15,755   |          | 91,487  |         |                | mono        | 8         | 8      | 0      | 8+0     |
| 14 | indel_03 | 2121707 | 268    |        | 22,181   |          | 133,697 |         |                | mono        | 7         | 7      | 0      | 7+0     |
| 15 | indel_03 | 3208698 | 268    |        | 10,875   |          | 67,503  |         |                | mono        | 5         | 5      | 0      | 5+0     |
| 16 | indel_03 | 3216315 | 268    |        | 13,555   |          | 80,678  |         |                | mono        | 5         | 5      | 0      | 5+0     |
| 17 | indel_03 | 3216321 | 268    |        | 12,720   |          | 76,990  |         |                | mono        | 5         | 5      | 0      | 5+0     |
| 18 | indel_03 | 4107150 | 268    |        | 9,197    |          | 56,043  |         |                | mono        | 7         | 7      | 0      | 7+0     |
| 19 | indel_03 | 5217603 | 268    |        | 14,715   |          | 88,504  |         |                | mono        | 8         | 8      | 0      | 8+0     |
| 20 | indel_03 | 5225985 | 268    |        | 15,033   |          | 95,710  |         |                | mono        | 8         | 8      | 0      | 8+0     |
| 21 | indel_03 | 6117387 | 268    |        | 11,627   |          | 80,031  |         |                | mono        | 6         | 6      | 0      | 6+0     |
| 22 | indel_03 | 6132079 | 268    |        | 13,075   |          | 77,032  |         |                | mono        | 8         | 8      | 0      | 8+0     |
| 23 | indel_03 | NA12760 | 268    |        | 14,186   |          | 87,036  |         |                | mono        | 6         | 6      | 0      | 6+0     |
| 24 | indel_03 | 4779    | 268    |        | 11,787   |          | 64,976  |         |                | mono        | 2         | 2      | 0      | 2+0     |
| 25 | indel_03 | 1123584 |        | 272    |          | 16,099   |         | 90,179  |                | mono        | 2         | 0      | 2      | 0+2     |
| 1  | indel_04 | 1112103 | 255    | 258    | 5,801    | 10,411   | 40,039  | 72,703  | 0.55           | informative | 3         | 1      | 2      | 1+2     |
| 2  | indel_04 | 1102560 | 255    | 258    | 5,993    | 11,077   | 35,291  | 65,678  | 0.54           | informative | 3         | 1      | 2      | 1+2     |
| 3  | indel_04 | 3216321 | 255    | 258    | 11,187   | 15,644   | 74,575  | 103,833 | 0.72           | informative | 5         | 2      | 3      | 2+3     |
| 4  | indel_04 | 5229799 | 255    | 258    | 18,254   | 31,431   | 109,595 | 201,568 | 0.54           | informative | 6         | 2      | 4      | 2+4     |
| 5  | indel_04 | 6117387 | 255    | 258    | 10,311   | 18,429   | 60,214  | 111,743 | 0.54           | informative | 6         | 2      | 4      | 2+4     |
| 6  | indel_04 | 1105126 | 255    | 258    | 16,531   | 9,908    | 100,045 | 60,050  | 1.67           | ambiguous   | 3         | 2      | 1      | 2+1     |
| 7  | indel_04 | 1123584 | 255    | 258    | 18,071   | 16,684   | 106,524 | 99,994  | 1.07           | bi (1:1)    | 2         | 1      | 1      | 1+1     |
| 8  | indel_04 | 1105758 | 255    | 258    | 7,434    | 6,858    | 43,592  | 41,074  | 1.06           | bi (1:1)    | 2         | 1      | 1      | 1+1     |
| 9  | indel_04 | 5126875 | 255    | 258    | 12,466   | 15,309   | 72,882  | 88,645  | 0.82           | bi (1:1)    | 2         | 1      | 1      | 1+1     |

|    |          |         |     |     |        |        |        |         |      |             |   |   |   |     |
|----|----------|---------|-----|-----|--------|--------|--------|---------|------|-------------|---|---|---|-----|
| 10 | indel_04 | NA12716 | 255 | 258 | 14,847 | 14,242 | 87,654 | 81,304  | 1.08 | bi (1:1)    | 2 | 1 | 1 | 1+1 |
| 11 | indel_04 | 1101938 |     | 258 |        | 8,992  |        | 53,994  |      | mono        | 4 | 0 | 4 | 0+4 |
| 12 | indel_04 | 1102576 |     | 258 |        | 15,782 |        | 96,570  |      | mono        | 3 | 0 | 3 | 0+3 |
| 13 | indel_04 | 1103200 |     | 258 |        | 15,722 |        | 91,549  |      | mono        | 4 | 0 | 4 | 0+4 |
| 14 | indel_04 | 1103819 |     | 258 |        | 14,910 |        | 88,248  |      | mono        | 4 | 0 | 4 | 0+4 |
| 15 | indel_04 | 1128707 |     | 258 |        | 32,695 |        | 224,749 |      | mono        | 8 | 0 | 8 | 0+8 |
| 16 | indel_04 | 2121707 |     | 258 |        | 31,515 |        | 204,031 |      | mono        | 7 | 0 | 7 | 0+7 |
| 17 | indel_04 | 3208698 |     | 258 |        | 23,866 |        | 140,230 |      | mono        | 5 | 0 | 5 | 0+5 |
| 18 | indel_04 | 3216315 |     | 258 |        | 29,124 |        | 174,763 |      | mono        | 5 | 0 | 5 | 0+5 |
| 19 | indel_04 | 4107150 |     | 258 |        | 21,597 |        | 132,060 |      | mono        | 7 | 0 | 7 | 0+7 |
| 20 | indel_04 | 5217603 |     | 258 |        | 21,420 |        | 131,336 |      | mono        | 8 | 0 | 8 | 0+8 |
| 21 | indel_04 | 5225985 |     | 259 |        | 23,591 |        | 154,270 |      | mono        | 8 | 0 | 8 | 0+8 |
| 22 | indel_04 | 6132079 |     | 258 |        | 12,575 |        | 75,873  |      | mono        | 8 | 0 | 8 | 0+8 |
| 23 | indel_04 | NA12760 |     | 258 |        | 30,999 |        | 190,978 |      | mono        | 6 | 0 | 6 | 0+6 |
| 24 | indel_04 | 2813    |     | 258 |        | 32,098 |        | 208,604 |      | mono        | 6 | 0 | 6 | 0+6 |
| 25 | indel_04 | 4779    |     | 258 |        | 29,675 |        | 182,148 |      | mono        | 2 | 0 | 2 | 0+2 |
| 1  | indel_05 | 1102576 | 390 | 394 | 2,016  | 3,903  | 13,885 | 27,596  | 0.50 | informative | 3 | 1 | 2 | 1+2 |
| 2  | indel_05 | 1128707 | 390 | 394 | 2,528  | 5,769  | 18,467 | 39,799  | 0.46 | informative | 8 | 2 | 6 | 2+6 |
| 3  | indel_05 | 3208698 | 390 | 394 | 3,379  | 4,916  | 24,120 | 35,693  | 0.68 | informative | 5 | 2 | 3 | 2+3 |
| 4  | indel_05 | 1105126 | 390 | 394 | 4,326  | 2,235  | 30,212 | 15,737  | 1.92 | informative | 3 | 2 | 1 | 2+1 |
| 5  | indel_05 | 1102560 | 391 | 394 | 5,301  | 2,581  | 37,753 | 18,470  | 2.04 | informative | 3 | 2 | 1 | 2+1 |
| 6  | indel_05 | 5225985 | 390 | 394 | 4,436  | 5,602  | 32,630 | 42,427  | 0.77 | informative | 8 | 3 | 5 | 3+5 |
| 7  | indel_05 | 4107150 | 390 | 394 | 2,090  | 3,491  | 16,026 | 26,832  | 0.60 | informative | 7 | 3 | 4 | 3+4 |
| 8  | indel_05 | NA12760 | 390 | 394 | 3,228  | 6,364  | 23,071 | 44,938  | 0.51 | informative | 6 | 2 | 4 | 2+4 |
| 9  | indel_05 | 6117387 | 390 | 394 | 4,803  | 3,730  | 33,821 | 27,132  | 1.25 | bi (1:1)    | 6 | 3 | 3 | 3+3 |
| 10 | indel_05 | 1105758 | 390 | 394 | 5,638  | 5,621  | 39,523 | 38,604  | 1.02 | bi (1:1)    | 2 | 1 | 1 | 1+1 |
| 11 | indel_05 | 1123584 | 390 | 394 | 4,637  | 4,756  | 33,401 | 33,340  | 1.00 | bi (1:1)    | 2 | 1 | 1 | 1+1 |
| 12 | indel_05 | 1101938 | 390 | 394 | 2,996  | 3,012  | 21,214 | 21,440  | 0.99 | bi (1:1)    | 4 | 2 | 2 | 2+2 |
| 13 | indel_05 | 2121707 | 390 | 394 | 3,561  | 3,251  | 25,571 | 23,833  | 1.07 | bi (1:1)    | 7 | 4 | 3 | 4+3 |
| 14 | indel_05 | 2813    | 391 | 394 | 3,649  | 3,882  | 26,815 | 27,611  | 0.97 | bi (1:1)    | 6 | 3 | 3 | 3+3 |
| 15 | indel_05 | 4779    | 390 | 394 | 5,275  | 5,390  | 38,561 | 39,716  | 0.97 | bi (1:1)    | 2 | 1 | 1 | 1+1 |
| 16 | indel_05 | 5229799 | 390 | 394 | 3,073  | 4,083  | 27,112 | 32,400  | 0.84 | bi (1:1)    | 6 | 3 | 3 | 3+3 |
| 17 | indel_05 | 1112103 | 390 |     | 11,343 |        | 79,842 |         |      | mono        | 3 | 3 | 0 | 3+0 |
| 18 | indel_05 | 5126875 | 390 |     | 6,503  |        | 46,279 |         |      | mono        | 2 | 2 | 0 | 2+0 |
| 19 | indel_05 | 1103200 |     | 394 |        | 4,850  |        | 35,146  |      | mono        | 4 | 0 | 4 | 0+4 |

|    |          |         |     |     |        |        |        |         |             |             |   |   |   |     |
|----|----------|---------|-----|-----|--------|--------|--------|---------|-------------|-------------|---|---|---|-----|
| 20 | indel_05 | 1103819 |     | 394 |        | 5,667  |        | 40,899  |             | mono        | 4 | 0 | 4 | 0+4 |
| 21 | indel_05 | 3216315 |     | 394 |        | 7,339  |        | 53,243  |             | mono        | 5 | 0 | 5 | 0+5 |
| 22 | indel_05 | 3216321 |     | 394 |        | 6,659  |        | 46,127  |             | mono        | 5 | 0 | 5 | 0+5 |
| 23 | indel_05 | 5217603 |     | 394 |        | 6,855  |        | 47,158  |             | mono        | 8 | 0 | 8 | 0+8 |
| 24 | indel_05 | 6132079 |     | 394 |        | 8,216  |        | 55,872  |             | mono        | 8 | 0 | 8 | 0+8 |
| 25 | indel_05 | NA12716 |     | 394 |        | 5,848  |        | 42,672  |             | mono        | 2 | 0 | 2 | 0+2 |
| 1  | indel_06 | 1102560 | 311 | 315 | 7,003  | 13,577 | 42,081 | 83,676  | 0.50        | informative | 3 | 1 | 2 | 1+2 |
| 2  | indel_06 | 1105126 | 311 | 315 | 5,981  | 11,627 | 38,237 | 72,980  | 0.52        | informative | 3 | 1 | 2 | 1+2 |
| 3  | indel_06 | 1112103 | 311 | 315 | 10,816 | 5,206  | 68,368 | 32,993  | 2.07        | informative | 3 | 2 | 1 | 2+1 |
| 4  | indel_06 | 6117387 | 311 | 315 | 7,150  | 12,066 | 44,002 | 75,744  | 0.58        | informative | 6 | 2 | 4 | 2+4 |
| 5  | indel_06 | 2813    | 311 | 315 | 5,621  | 10,196 | 34,976 | 63,673  | 0.55        | informative | 6 | 2 | 4 | 2+4 |
| 6  | indel_06 | 4107150 | 311 | 315 | 5,659  | 13,296 | 34,963 | 81,932  | 0.43        | informative | 7 | 2 | 5 | 2+5 |
| 7  | indel_06 | 1101938 | 311 | 315 | 7,648  | 6,095  | 47,382 | 38,239  | 1.24        | bi (1:1)    | 4 | 2 | 2 | 2+2 |
| 8  | indel_06 | 1105758 | 311 | 315 | 7,282  | 6,939  | 44,169 | 43,631  | 1.01        | bi (1:1)    | 2 | 1 | 1 | 1+1 |
| 9  | indel_06 | 1123584 | 311 | 315 | 8,378  | 8,184  | 52,735 | 51,051  | 1.03        | bi (1:1)    | 2 | 1 | 1 | 1+1 |
| 10 | indel_06 | 4779    | 311 | 315 | 6,585  | 6,103  | 41,523 | 38,446  | 1.08        | bi (1:1)    | 2 | 1 | 1 | 1+1 |
| 11 | indel_06 | 5126875 | 311 |     | 13,214 |        | 83,292 |         |             | mono        | 2 | 2 | 0 | 2+0 |
| 12 | indel_06 | 1102576 |     | 315 |        | 9,985  |        | 63,431  |             | mono        | 3 | 0 | 3 | 0+3 |
| 13 | indel_06 | 1103200 |     | 315 |        | 12,990 |        | 81,564  |             | mono        | 4 | 0 | 4 | 0+4 |
| 14 | indel_06 | 1103819 |     | 315 |        | 14,706 |        | 90,018  |             | mono        | 4 | 0 | 4 | 0+4 |
| 15 | indel_06 | 1128707 |     | 315 |        | 13,331 |        | 84,709  |             | mono        | 8 | 0 | 8 | 0+8 |
| 16 | indel_06 | 2121707 |     | 315 |        | 18,051 |        | 111,913 |             | mono        | 7 | 0 | 7 | 0+7 |
| 17 | indel_06 | 3208698 |     | 315 |        | 15,111 |        | 94,998  |             | mono        | 5 | 0 | 5 | 0+5 |
| 18 | indel_06 | 3216315 |     | 315 |        | 19,523 |        | 123,196 |             | mono        | 5 | 0 | 5 | 0+5 |
| 19 | indel_06 | 3216321 |     | 315 |        | 12,959 |        | 82,692  |             | mono        | 5 | 0 | 5 | 0+5 |
| 20 | indel_06 | 5217603 |     | 315 |        | 17,224 |        | 107,317 |             | mono        | 8 | 0 | 8 | 0+8 |
| 21 | indel_06 | 5225985 |     | 315 |        | 10,374 |        | 66,793  |             | mono        | 8 | 0 | 8 | 0+8 |
| 22 | indel_06 | 5229799 |     | 315 |        | 13,615 |        | 91,653  |             | mono        | 6 | 0 | 6 | 0+6 |
| 23 | indel_06 | 6132079 |     | 315 |        | 20,491 |        | 126,171 |             | mono        | 8 | 0 | 8 | 0+8 |
| 24 | indel_06 | NA12716 |     | 315 |        | 14,444 |        | 92,332  |             | mono        | 2 | 0 | 2 | 0+2 |
| 25 | indel_06 | NA12760 |     | 315 |        | 14,573 |        | 92,685  |             | mono        | 6 | 0 | 6 | 0+6 |
| 1  | indel_07 | 3216315 | 319 | 324 | 1256   | 4301   | 8,201  | 28,378  | 0.288991472 | informative | 5 | 1 | 4 | 1+4 |
| 2  | indel_07 | 4107150 | 319 | 324 | 96     | 584    | 611    | 3,738   | 0.163456394 | informative | 7 | 1 | 6 | 1+6 |
| 3  | indel_07 | 5229799 | 319 | 324 | 3912   | 7545   | 25,408 | 49,517  | 0.513116707 | informative | 6 | 2 | 4 | 2+4 |
| 4  | indel_07 | NA12760 | 319 | 324 | 2468   | 5090   | 16,186 | 34,430  | 0.470113273 | informative | 6 | 2 | 4 | 2+4 |

|    |          |         |     |     |       |      |        |        |             |             |   |   |   |     |
|----|----------|---------|-----|-----|-------|------|--------|--------|-------------|-------------|---|---|---|-----|
| 5  | indel_07 | 5225985 | 319 | 324 | 1876  | 4582 | 12,521 | 30,360 | 0.412417655 | informative | 8 | 2 | 6 | 2+6 |
| 6  | indel_07 | 2121707 | 319 | 324 | 4615  | 5955 | 30,061 | 39,501 | 0.761018708 | informative | 7 | 3 | 4 | 3+4 |
| 7  | indel_07 | 3216321 | 319 | 324 | 5453  | 3713 | 35,891 | 24,290 | 1.477603952 | informative | 5 | 3 | 2 | 3+2 |
| 8  | indel_07 | 6132079 | 319 | 324 | 7208  | 4666 | 48,581 | 31,684 | 1.533297563 | informative | 8 | 5 | 3 | 5+3 |
| 9  | indel_07 | 5217603 | 319 | 324 | 8663  | 3134 | 57,051 | 20,743 | 2.75037362  | informative | 8 | 6 | 2 | 6+2 |
| 10 | indel_07 | 6117387 | 319 | 324 | 4756  | 4783 | 31,119 | 31,898 | 0.975578406 | bi (1:1)    | 6 | 3 | 3 | 3+3 |
| 11 | indel_07 | 2813    | 319 | 325 | 2181  | 2166 | 14,394 | 14,291 | 1.007207333 | bi (1:1)    | 6 | 3 | 3 | 3+3 |
| 12 | indel_07 | 1128707 | 319 | 324 | 6772  | 6958 | 44,027 | 46,094 | 0.955156853 | bi (1:1)    | 8 | 4 | 4 | 4+4 |
| 13 | indel_07 | 1101938 | 319 | 325 | 3933  | 4923 | 27,152 | 34,466 | 0.787790866 | bi (1:1)    | 4 | 1 | 1 | 2+2 |
| 14 | indel_07 | 1112103 |     | 325 | 12070 |      |        | 81,644 |             | mono        | 3 |   |   |     |
| 15 | indel_07 | 1105126 |     | 324 | 6952  |      |        | 47,114 |             | mono        | 3 |   |   |     |
| 16 | indel_07 | 1102576 |     | 324 | 3607  |      |        | 23,723 |             | mono        | 3 |   |   |     |
| 17 | indel_07 | 3208698 |     | 324 | 3186  |      |        | 21,210 |             | mono        | 5 |   |   |     |
| 18 | indel_07 | 1103819 |     | 324 | 9521  |      |        | 71,812 |             | mono        | 4 |   |   |     |
| 19 | indel_07 | 1103200 |     | 324 | 12338 |      |        | 81,160 |             | mono        | 4 |   |   |     |
| 20 | indel_07 | 5126875 |     | 325 | 12658 |      |        | 84,537 |             | mono        | 2 |   |   |     |
| 21 | indel_07 | 1123584 |     | 324 | 3955  |      |        | 26,284 |             | mono        | 2 |   |   |     |
| 22 | indel_07 | 1105758 |     | 325 | 10738 |      |        | 71,758 |             | mono        | 2 |   |   |     |
| 23 | indel_07 | 1102560 |     | 324 | 14082 |      |        | 92,938 |             | mono        | 3 |   |   |     |
| 24 | indel_07 | 4779    |     | 324 | 7019  |      |        | 46,803 |             | mono        | 2 |   |   |     |
| 25 | indel_07 | NA12716 |     | 324 | 4802  |      |        | 32,909 |             | mono        | 2 |   |   |     |

| Indel                                               | non informative tests |                  |           | informative tests        |          |
|-----------------------------------------------------|-----------------------|------------------|-----------|--------------------------|----------|
|                                                     | one peak              | two peaks<br>1:1 | ambiguous | two peaks<br>unequal 1:1 | f of all |
| 3                                                   | 14                    | 4                | 1         | 6                        | 0.24     |
| 4                                                   | 15                    | 4                | 1         | 5                        | 0.20     |
| 5                                                   | 9                     | 8                | 0         | 8                        | 0.32     |
| 6                                                   | 15                    | 4                | 0         | 6                        | 0.24     |
| 7                                                   | 12                    | 4                | 0         | 9                        | 0.36     |
|                                                     |                       |                  |           | 34                       |          |
| unique tests with two peaks unequal 1:1 peak ratios |                       |                  |           | 17                       | 0.68     |
| tests, total                                        |                       |                  |           | 125                      |          |

| indel      | NCBI entry  | BAC library*) | variant | map NCBI nt entry  | map UCSC GRCh37 hg19 | Blast vs hg19 (highest score) | Taudien 2004       |
|------------|-------------|---------------|---------|--------------------|----------------------|-------------------------------|--------------------|
| indel 1    | AC092111.9  | RPCI-11       | long    | chr12              | chr12                | chr12:8.25Mb                  | na                 |
|            | AC092745.7  | RPCI-11       | long    | chr12              | chr12                | chr12:8.25Mb                  | na                 |
|            | AC105214.6  | RPCI-11       | long    | chr8               | chr8:12.3Mb          | chr8:12.3Mb or cluster b2     | not to assign      |
|            | AC130360.4  | RPCI-11       | short   | chr8               | chr8 DEFcluster b1   | chr8 DEFcluster b1            | chr8 DEFcluster b1 |
|            | AF228730.8  | SCb           | short   | chr8               | chr8 DEFcluster b1   | chr8 DEFcluster b1            | chr8 DEFcluster b1 |
|            | AC105233.12 | RPCI-11       | short   | chr8               | chr8 DEFcluster b2   | chr8 DEFcluster b2            | chr8 DEFcluster b2 |
|            | AC131269.3  | RPCI-11       | short   | chr8               | na                   | chr8 DEFcluster b1 or b2      | chr8 DEFcluster b2 |
|            | AC130339.12 | RPCI-13       | short   | chr8               | na                   | chr8 DEFcluster b1            | chr8 DEFcluster b1 |
| AC130365.5 | RPCI-11     | short         | chr8    | chr8 DEFcluster b2 | chr8 DEFcluster b2   | chr8 DEFcluster b2            |                    |
| AF252830.5 | SCb         | long          | chr8    | na                 | chr8 DEFcluster b2   | chr8 DEFcluster b3            |                    |
| indel 2    | AC130339.12 | RPCI-13       | short   | chr8               | na                   | chr8 DEFcluster b1            | chr8 DEFcluster b1 |
|            | AC130360.4  | RPCI-11       | short   | chr8               | chr8 DEFcluster b1   | chr8 DEFcluster b1            | chr8 DEFcluster b1 |
|            | AC130365.5  | RPCI-11       | short   | chr8               | chr8 DEFcluster b2   | chr8 DEFcluster b2            | chr8 DEFcluster b2 |
|            | AC130367.12 | RPCI-11       | short   | chr8               | na                   | chr8 DEFcluster b1            | chr8 DEFcluster b1 |
|            | AC131269.3  | RPCI-11       | short   | chr8               | na                   | chr8 DEFcluster b1 or b2      | chr8 DEFcluster b2 |
|            | AC134395.7  | RPCI-11       | short   | chr8               | na                   | chr8 DEFcluster b1            | not to assign      |
|            | AC134683.9  | RPCI-11       | short   | chr8               | na                   | chr8 DEFcluster b1            | not to assign      |
|            | AC243982.3  | CHORI-17      | short   | chr8               | na                   | chr8 DEFcluster b1            | na                 |
|            | AF252830.5  | SCb           | short   | chr8               | na                   | chr8 DEFcluster b2            | chr8 DEFcluster b3 |
|            | AF252831.2  | SCb           | short   | chr8               | na                   | chr8 DEFcluster b1            | chr8 DEFcluster b1 |
|            | AF285443.4  | SCb           | short   | chr8               | na                   | chr8 DEFcluster b1 or b2      | chr8 DEFcluster b3 |
|            | AC116655.7  | CTD           | long    | chr4               | chr4:9Mb             | chr4:9Mb                      | na                 |
|            | AC117179.4  | CTD           | long    | chr4               | na                   | chr4:9Mb                      | na                 |
|            | AC130366.6  | RPCI-11       | long    | chr8               | chr8:12.0Mb          | chr8:12.0Mb                   | na                 |
|            | AC244249.3  | CHORI-17      | long    | chr8               | na                   | chr8:12.0Mb                   | na                 |
|            | AC130379.8  | RPCI-13       | short   | chr17              | na                   | chr8:12.3Mb                   | na                 |
|            | AC087203.12 | RPCI-11       | long    | chr8               | chr8:12.3Mb          | chr8:12.3Mb                   | na                 |
|            | AC105214.6  | RPCI-11       | long    | chr8               | chr8:12.3Mb          | chr8:12.3Mb                   | not to assign      |
| AC130337.6 | RPCI-13     | long          | chr8    | na                 | chr8:12.3Mb          | na                            |                    |
| AC243920.3 | CHORI-17    | long          | chr8    | na                 | chr8:12.3Mb          | na                            |                    |
| AC092111.9 | RPCI-11     | short         | chr12   | chr12:8.25Mb       | chr12:8.25Mb         | na                            |                    |
| AP002495.3 | CTD         | long          | chr11q  | chr11:71.2Mb       | chr11:71.2Mb         | na                            |                    |

| *) library | provider          | description                              |
|------------|-------------------|------------------------------------------|
| RPCI-11    | P.deJong, CHORI   | 1 male donor                             |
| RPCI-13    | P.deJong, CHORI   | 1 female donor                           |
| CHORI-17   | P.deJong, CHORI   | Haploid cell line from hydatidiform mole |
| CTD        | CalTech           | 1 male donor (sperm)                     |
| SCb        | Research Genetics | No information available                 |



# INDEL 1

5' forward primer 3'

1 10 20

| indel_1 fwd   | 1 | 2 | 3 | 4 | 5 | 6 | 7 | 8 | 9 | 10 | 11 | 12 | 13 | 14 | 15 | 16 | 17 | 18 | 19 | 20 | 21 | 22 | 23 | 24 | 25 | 26 | 27 | 28 | 29 | 30 |   |   |
|---------------|---|---|---|---|---|---|---|---|---|----|----|----|----|----|----|----|----|----|----|----|----|----|----|----|----|----|----|----|----|----|---|---|
| A_ch8:7170725 | A | A | T | T | C | A | C | T | T | G  | T  | C  | T  | G  | A  | A  | G  | T  | T  | C  | C  | T  | T  | T  | A  | A  | C  | -  | -  | -  | - | - |
| B_ch8:7854329 | A | A | T | T | C | A | C | T | T | G  | T  | C  | T  | G  | A  | A  | G  | T  | T  | C  | C  | T  | T  | T  | A  | A  | C  | -  | -  | -  | - | - |
| C_ch12:835858 | A | A | T | T | C | A | C | T | T | G  | T  | C  | T  | G  | A  | A  | G  | T  | T  | C  | C  | T  | T  | T  | A  | A  | C  | -  | -  | -  | - | - |
| D_ch4:9193090 | A | A | T | T | C | A | C | T | T | G  | T  | C  | T  | G  | A  | A  | G  | T  | T  | C  | C  | T  | T  | T  | A  | A  | C  | -  | -  | -  | - | - |
| E_ch8:1201482 | A | A | T | T | C | A | C | T | T | G  | T  | C  | T  | G  | A  | A  | G  | T  | T  | C  | C  | T  | T  | T  | A  | A  | C  | -  | -  | -  | - | - |
| F_ch8:1225715 | A | A | T | T | C | A | C | T | T | G  | T  | C  | T  | G  | A  | A  | G  | T  | T  | C  | C  | T  | T  | T  | A  | A  | C  | -  | -  | -  | - | - |

3' reverse primer 5'

1 10 20

| indel_1 rev   | 1 | 2 | 3 | 4 | 5 | 6 | 7 | 8 | 9 | 10 | 11 | 12 | 13 | 14 | 15 | 16 | 17 | 18 | 19 | 20 | 21 | 22 | 23 | 24 | 25 | 26 | 27 | 28 | 29 | 30 |   |
|---------------|---|---|---|---|---|---|---|---|---|----|----|----|----|----|----|----|----|----|----|----|----|----|----|----|----|----|----|----|----|----|---|
| A_ch8:7170725 | - | - | - | - | - | T | G | T | T | C  | T  | G  | T  | T  | G  | T  | A  | T  | C  | C  | T  | T  | A  | C  | T  | T  | -  | -  | -  | -  | - |
| B_ch8:7854329 | G | G | T | C | A | T | G | T | T | C  | T  | G  | T  | T  | G  | T  | A  | T  | C  | C  | T  | T  | A  | C  | T  | T  | -  | -  | -  | -  | - |
| C_ch12:835858 | G | G | T | C | A | T | G | T | T | C  | T  | G  | T  | T  | G  | T  | A  | T  | C  | C  | T  | T  | A  | C  | T  | T  | -  | -  | -  | -  | - |
| D_ch4:9193090 | G | G | T | C | A | C | A | T | T | C  | T  | G  | T  | T  | G  | T  | A  | T  | C  | C  | T  | T  | A  | C  | T  | T  | -  | -  | -  | -  | - |
| E_ch8:1201482 | G | G | T | C | A | C | A | T | T | C  | T  | G  | T  | T  | G  | T  | A  | T  | C  | T  | T  | T  | A  | C  | T  | T  | -  | -  | -  | -  | - |
| F_ch8:1225715 | G | G | T | C | A | C | A | T | T | C  | T  | G  | T  | T  | G  | T  | A  | T  | C  | T  | T  | T  | A  | C  | T  | T  | -  | -  | -  | -  | - |

red: paralogs D\_F – not amplified due to mismatches, at 3' end of the reverse primer

blue: DEF cluster copies A+B, co-amplified with paralogs C

# INDEL 2

5' forward primer 3'

|                | 1                                                               | 10 | 20 | 30 |
|----------------|-----------------------------------------------------------------|----|----|----|
| indel 2.fw     | A T A C A G T A G T G G A T G A G G C A A A T A T A C A - - -   |    |    |    |
| J_chr8:7859242 | C T G C A G T A G T A G A G G G G G G C A A A T A T A T G T T C |    |    |    |
| K_chr8:7165893 | C T G C A G T A G T A G A G G G G G G C A A A T A T A T G T T C |    |    |    |
| H_chr8:1226207 | C T G C A G T A G T A G A G G G A G G C A A A T A T A C G T T C |    |    |    |
| I_chr8:1201975 | C T G C A G T A G T A G A G G G A G G C A A A T A T A C G T T C |    |    |    |
| G_chr12:836381 | C T T C A G T A G T A G A G G G A G G C A A A T A T A C G T T C |    |    |    |
| A_chr8:7230128 | A T A C A G T A G T G G A T G A G G C A A A T A T A C A T T C   |    |    |    |
| B_chr8:7796542 | A T A C A G T A G T G G A T G A G G C A A A T A T A C A T T C   |    |    |    |
| C_chr11:715437 | A T A C A G T A G T G G A T G A G G C A A A T A T A C A T T C   |    |    |    |
| D_chr4:9400392 | A T A T T G T C G T G G A T G A G G C A A A T A T A C A T T C   |    |    |    |
| E_chr8:1195729 | A T A C A G C A G T G G A T G A G A C A A A T A T A C A T T C   |    |    |    |
| F_chr8:1220353 | A T A C A G C A G T G G A T G A G A C A A A T A T A C A T T C   |    |    |    |

indel 2 3' reverse primer 5'

|                | 1                                                           | 10 | 20 | 30 |
|----------------|-------------------------------------------------------------|----|----|----|
| indel 2.rev    | - - - - - G C T T A T G T C C C C A T T T A A C A A G G     |    |    |    |
| J_chr8:7859242 | A T T T G T A G C T T A T G T T C C C A T T T A A C A A G G |    |    |    |
| K_chr8:7165893 | A T T T G T A G C T T A T G T T C C C A T T T A A C A A G G |    |    |    |
| H_chr8:1226207 | A T T G G T A G C T T A T G T T C C C A T T T A A C A A G G |    |    |    |
| I_chr8:1201975 | A T T G G T A G C T T A T G T T C C C A T T T A A C A A G G |    |    |    |
| G_chr12:836381 | A T T T G T A G C T T A T G T T C C C A T T T A A C A A G G |    |    |    |
| A_chr8:7230128 | G T - - - - A G C T T A T G T C C C C A T T T A A C A A G G |    |    |    |
| B_chr8:7796542 | G T - - - - A G C T T A T G T C C C C A T T T A A C A A G G |    |    |    |
| C_chr11:715437 | G T T T G T A G C T T A T G T C C C C A T T T A A C A A G G |    |    |    |
| D_chr4:9400392 | G T T T G T A G C T T A T G T C C C C A T T T A A C A A G G |    |    |    |
| E_chr8:1195729 | G T T T G T A G C T T A T G T C C C C A T T T A A C A A G G |    |    |    |
| F_chr8:1220353 | G T T T G T A G C T T A T G T C C C C A T T T A A C A A G G |    |    |    |

red: paralogs G-K – not amplified due to numerous mismatches, particularly at 3' end of the forward primer

blue: DEF cluster copies A+B, co-amplified with paralogs C-F

**No. of clones identified by TOPO-TA-cloning and Sanger sequencing with non-labeled primers**

| indel   | paralogs              | hg19 positions (amplicon)                     | sample ID |         |         | total | variant                                                      | comment                                             |
|---------|-----------------------|-----------------------------------------------|-----------|---------|---------|-------|--------------------------------------------------------------|-----------------------------------------------------|
|         |                       |                                               | 1105126   | 3208698 | 2121707 |       |                                                              |                                                     |
| 1       | A and B (DEF cluster) | chr8:7170725-7171082                          | 20        | 13      | 22      | 55    | short                                                        | expected to amplify                                 |
|         | C                     | chr8:7854329+7854686<br>chr12:8358585+8358947 | 8         | 10      | 6       | 24    | long                                                         |                                                     |
|         | D                     | chr4: 9193090-9193452                         | 0         | 0       | 0       | 0     | long                                                         | not expected to amplify due to 3' primer mismatches |
|         | E                     | chr8:12014823-12015185                        | 0         | 0       | 0       | 0     | long                                                         |                                                     |
|         | F                     | chr8:12257155-12257517                        | 0         | 0       | 0       | 0     | long                                                         |                                                     |
| chimera |                       | 3                                             | 1         | 2       | 6       | both  | derived from paralogs A/B and C, no hints for paralogs D.E.F |                                                     |
|         |                       |                                               | 31        | 24      | 30      | 85    |                                                              |                                                     |

| indel   | paralogs              | hg19 positions (amplicon)                       | sample ID |         |   | total | variant                                                          | comment                                             |
|---------|-----------------------|-------------------------------------------------|-----------|---------|---|-------|------------------------------------------------------------------|-----------------------------------------------------|
|         |                       |                                                 | 1101938   | 3216315 |   |       |                                                                  |                                                     |
| 2       | A and B (DEF cluster) | chr8:7230128-7230416                            | 2         | 7       |   | 9     | short                                                            | expected to amplify                                 |
|         | C                     | chr8:7796542-7796830<br>chr11:71543706-71543998 | 3         | 1       |   | 4     | long                                                             |                                                     |
|         | D                     | chr4:9400392-9400684                            | 15        | 19      |   | 34    | long                                                             |                                                     |
|         | E                     | chr8:11957294-11957586                          | 23        | 7       |   | 30    | long                                                             |                                                     |
|         | F                     | chr8:12203537-12203829                          |           |         |   |       | long                                                             |                                                     |
|         | G                     | chr12:8363813-8364099                           | 0         | 0       |   | 0     | long                                                             | not expected to amplify due to 3' primer mismatches |
|         | H                     | chr8:12262077-12262362                          | 0         | 0       |   | 0     | long                                                             |                                                     |
|         | I                     | chr8:12019754-12020039                          | 0         | 0       |   | 0     | long                                                             |                                                     |
|         | J                     | chr8:7859242-7859522                            | 0         | 0       |   | 0     | long                                                             |                                                     |
|         | K                     | chr8:7165893-7166173                            | 0         | 0       |   | 0     | long                                                             |                                                     |
| chimera |                       | 0                                               | 3         |         | 3 | long  | derived from paralogs C and D, no hints for paralogs A.B and E-K |                                                     |
|         |                       |                                                 | 43        | 37      |   | 80    |                                                                  |                                                     |

|    | indel    | ID      | Size 1 | Size 2 | Height 1 | Height 2 | Area 1  | Area 2  | area 1/2 ratio | average area 1/2 ratio per CN class | STDEV per CN class | CN (MLPA) | expected area ratio with respect to the paralogs (A+B)/C |
|----|----------|---------|--------|--------|----------|----------|---------|---------|----------------|-------------------------------------|--------------------|-----------|----------------------------------------------------------|
| 1  | indel_01 | 1105758 | 357    | 362    | 26,340   | 24,647   | 192,769 | 179,922 | 1.07           | 0.83094                             | 0.26943            | 2         | 1.00                                                     |
| 2  | indel_01 | 1123584 | 357    | 362    | 15,799   | 14,731   | 116,422 | 114,860 | 1.01           |                                     |                    |           |                                                          |
| 3  | indel_01 | 5126875 | 358    | 363    | 22,164   | 28,930   | 166,631 | 258,112 | 0.65           |                                     |                    |           |                                                          |
|    | indel_01 |         | 358    | 363    | 21,034   | 27,362   | 153,695 | 230,288 | 0.67           |                                     |                    |           |                                                          |
| 4  | indel_01 | NA12716 | 358    | 363    | 13,907   | 29,297   | 114,257 | 242,380 | 0.47           |                                     |                    |           |                                                          |
| 5  | indel_01 | 4779    | 358    | 363    | 24,454   | 21,628   | 178,034 | 159,491 | 1.12           |                                     |                    |           |                                                          |
| 6  | indel_01 | 1102560 | 358    | 363    | 12,380   | 11,940   | 95,114  | 89,297  | 1.07           | 1.03442                             | 0.067              | 3         | 1.50                                                     |
| 7  | indel_01 | 1102576 | 358    | 363    | 12,913   | 12,983   | 95,622  | 97,275  | 0.98           |                                     |                    |           |                                                          |
| 8  | indel_01 | 1105126 | 358    | 363    | 15,033   | 15,332   | 125,415 | 128,599 | 0.98           |                                     |                    |           |                                                          |
| 9  | indel_01 | 1112103 | 358    | 363    | 26,477   | 23,581   | 206,805 | 185,595 | 1.11           |                                     |                    |           |                                                          |
| 10 | indel_01 | 1101938 | 358    | 363    | 11,916   | 11,003   | 93,859  | 85,586  | 1.10           | 1.06191                             | 0.08603            | 4         | 2.00                                                     |
| 11 | indel_01 | 1103200 | 358    | 363    | 5,642    | 4,784    | 42,678  | 37,932  | 1.13           |                                     |                    |           |                                                          |
| 12 | indel_01 | 1103819 | 358    | 363    | 16,771   | 17,313   | 135,196 | 140,254 | 0.96           |                                     |                    |           |                                                          |
| 13 | indel_01 | 3208698 | 358    | 363    | 22,268   | 22,017   | 162,764 | 163,613 | 0.99           | 1.11192                             | 0.10               | 5         | 2.50                                                     |
| 14 | indel_01 | 3216315 | 358    | 363    | 24,629   | 20,948   | 179,896 | 154,528 | 1.16           |                                     |                    |           |                                                          |
| 15 | indel_01 | 3216321 | 358    | 363    | 19,885   | 16,851   | 146,337 | 124,354 | 1.18           |                                     |                    |           |                                                          |
| 16 | indel_01 | 5229799 | 358    | 363    | 1,297    | 1,317    | 9,275   | 9,508   | 0.98           | 1.02348                             | 0.0731             | 6         | 3.00                                                     |
|    | indel_01 |         | 358    | 363    | 1,641    | 1,584    | 15,505  | 15,333  | 1.01           |                                     |                    |           |                                                          |
| 17 | indel_01 | 6117387 | 358    | 363    | 28,279   | 29,141   | 201,073 | 207,373 | 0.97           |                                     |                    |           |                                                          |
| 18 | indel_01 | NA12760 | 358    | 363    | 24,662   | 24,005   | 184,402 | 182,295 | 1.01           |                                     |                    |           |                                                          |
| 19 | indel_01 | 2813    | 358    | 363    | 11,909   | 10,081   | 86,661  | 75,391  | 1.15           |                                     |                    |           |                                                          |
|    | indel_01 |         | 358    | 363    | 1,742    | 1,745    | 12,207  | 12,184  | 1.00           |                                     |                    |           |                                                          |
| 20 | indel_01 | 2121707 | 358    | 363    | 1,507    | 1,454    | 10,870  | 10,496  | 1.04           | 0.9918                              | 0.03184            | 7         | 3.50                                                     |
|    | indel_01 |         | 358    | 363    | 20,158   | 20,516   | 152,222 | 153,503 | 0.99           |                                     |                    |           |                                                          |
| 21 | indel_01 | 4107150 | 358    | 363    | 1,102    | 1,181    | 8,136   | 8,584   | 0.95           |                                     |                    |           |                                                          |
|    | indel_01 |         | 358    | 363    | 2,416    | 2,521    | 17,616  | 17,939  | 0.98           |                                     |                    |           |                                                          |
| 22 | indel_01 | 1128707 | 358    | 363    | 29,595   | 27,182   | 210,935 | 198,689 | 1.06           | 1.06009                             | 0.04921            | 8         | 4.00                                                     |
| 23 | indel_01 | 5217603 | 358    | 363    | 24,819   | 21,875   | 179,543 | 157,962 | 1.14           |                                     |                    |           |                                                          |
| 24 | indel_01 | 5225985 | 359    | 363    | 1,765    | 1,738    | 12,277  | 12,180  | 1.01           |                                     |                    |           |                                                          |
|    | indel_01 |         | 358    | 363    | 1,520    | 1,486    | 10,696  | 10,410  | 1.03           |                                     |                    |           |                                                          |
| 25 | indel_01 | 6132079 | 358    | 363    | 26,264   | 24,627   | 190,285 | 178,381 | 1.07           |                                     |                    |           |                                                          |

|    | indel    | ID      | Size 1 | Size 2 | Height 1 | Height 2 | Area 1  | Area 2  | area 1/2 ratio | average area 1/2 ratio per CN class | STDEV per CN class | CN (MLPA) | expected area ratio with respect to the paralogs (A+B)/(C+D) |
|----|----------|---------|--------|--------|----------|----------|---------|---------|----------------|-------------------------------------|--------------------|-----------|--------------------------------------------------------------|
| 1  | indel_02 | NA12716 | 289    | 293    | 265      | 692      | 1,650   | 4,874   | 0.34           | 0.46                                | 0.07869            | 2         | 0.50                                                         |
| 2  | indel_02 | 4779    | 289    | 293    | 1,143    | 2,316    | 6,994   | 15,549  | 0.45           |                                     |                    |           |                                                              |
| 3  | indel_02 | 1123584 | 289    | 293    | 1,437    | 2,824    | 9,343   | 19,309  | 0.48           |                                     |                    |           |                                                              |
| 4  | indel_02 | 1105758 | 289    | 293    | 1,745    | 3,249    | 11,246  | 22,599  | 0.50           |                                     |                    |           |                                                              |
| 5  | indel_02 | 5126875 | 289    | 293    | 5,273    | 8,558    | 32,254  | 58,703  | 0.55           |                                     |                    |           |                                                              |
| 6  | indel_02 | 1102576 | 289    | 293    | 13,187   | 18,425   | 82,045  | 127,630 | 0.64           | 0.71                                | 0.07712            | 3         | 0.75                                                         |
| 7  | indel_02 | 1105126 | 289    | 293    | 5,786    | 8,106    | 37,520  | 57,101  | 0.66           |                                     |                    |           |                                                              |
| 8  | indel_02 | 1112103 | 289    | 293    | 3,906    | 4,724    | 24,631  | 33,689  | 0.73           |                                     |                    |           |                                                              |
| 9  | indel_02 | 1102560 | 289    | 293    | 32,079   | 32,207   | 289,634 | 357,389 | 0.81           |                                     |                    |           |                                                              |
| 10 | indel_02 | 1101938 | 289    | 293    | 22,835   | 26,795   | 144,103 | 184,558 | 0.78           | 0.86                                | 0.0669             | 4         | 1.00                                                         |
| 11 | indel_02 | 1103200 | 289    | 293    | 32,385   | 32,413   | 255,832 | 286,257 | 0.89           |                                     |                    |           |                                                              |
| 12 | indel_02 | 1103819 | 289    | 293    | 31,369   | 31,506   | 238,568 | 265,241 | 0.90           |                                     |                    |           |                                                              |
| 13 | indel_02 | 3208698 | 289    | 293    | 2,676    | 2,448    | 16,051  | 17,171  | 0.93           | 1.12                                | 0.16049            | 5         | 1.25                                                         |
| 14 | indel_02 | 3216315 | 289    | 293    | 1,877    | 1,287    | 11,815  | 9,804   | 1.21           |                                     |                    |           |                                                              |
| 15 | indel_02 | 3216321 | 289    | 293    | 2,561    | 1,868    | 16,615  | 13,621  | 1.22           |                                     |                    |           |                                                              |
| 16 | indel_02 | 2813    | 289    | 293    | 918      | 848      | 6,284   | 7,203   | 0.87           | 1.17                                | 0.22589            | 6         | 1.50                                                         |
| 17 | indel_02 | NA12760 | 289    | 293    | 1,020    | 732      | 6,698   | 5,835   | 1.15           |                                     |                    |           |                                                              |
| 18 | indel_02 | 5229799 | 289    | 293    | 1,596    | 1,109    | 9,685   | 7,551   | 1.28           |                                     |                    |           |                                                              |
| 19 | indel_02 | 6117387 | 289    | 293    | 1,310    | 892      | 7,920   | 5,670   | 1.40           |                                     |                    |           |                                                              |
| 20 | indel_02 | 4107150 | 289    | 293    | 2,596    | 1,683    | 16,755  | 11,651  | 1.44           |                                     |                    |           |                                                              |
| 21 | indel_02 | 2121707 | 289    | 293    | 4,901    | 3,022    | 30,065  | 20,215  | 1.49           | 1.46                                | 0.03478            | 7         | 1.75                                                         |
| 22 | indel_02 | 5225985 | 289    | 293    | 5,636    | 3,351    | 34,699  | 22,172  | 1.56           |                                     |                    |           |                                                              |
| 23 | indel_02 | 1128707 | 289    | 293    | 6,169    | 3,137    | 38,793  | 23,550  | 1.65           |                                     |                    |           |                                                              |
| 24 | indel_02 | 6132079 | 289    | 293    | 3,299    | 1,636    | 20,684  | 11,071  | 1.87           | 1.80                                | 0.2444             | 8         | 2.00                                                         |
| 25 | indel_02 | 5217603 | 289    | 293    | 3,464    | 1,528    | 21,440  | 10,162  | 2.11           |                                     |                    |           |                                                              |
